# Supplementary material
Source: publisher site journal article supplement (https://www.dovepress.com/article/340390)
Supplement: Supplementary file 1 [file get_supplementary_file.php]

## Supplementary Table S1 Search strategies

### 1. Pubmed search strategy

|    |                                                                               |
|----|-------------------------------------------------------------------------------|
| 1  | "Diabetic Neuropathies" [Mesh]                                                |
| 2  | Diabetic Neuropath* [Title/Abstract]                                          |
| 3  | Diabetic Neuralgia* [Title/Abstract]                                          |
| 4  | Diabetic Autonomic Neuropath* [Title/Abstract]                                |
| 5  | Painful Diabetic Neuropath* [Title/Abstract]                                  |
| 6  | Symmetric Diabetic Proximal Motor Neuropath* [Title/Abstract]                 |
| 7  | Asymmetric Diabetic Proximal Motor Neuropath* [Title/Abstract]                |
| 8  | Diabetic Asymmetric Polyneuropath* [Title/Abstract]                           |
| 9  | Diabetic Mononeuropath* [Title/Abstract]                                      |
| 10 | Diabetic Mononeuropathy Simplex [Title/Abstract]                              |
| 11 | Diabetic Amyotroph* [Title/Abstract]                                          |
| 12 | Diabetic Polyneuropath* [Title/Abstract]                                      |
| 13 | Diabetic neuritis [Title/Abstract]                                            |
| 14 | Diabetic peripheral neuropath* [Title/Abstract]                               |
| 15 | Diabetic polyneuritis [Title/Abstract]                                        |
| 16 | 1 OR 2 OR 3 OR 4 OR 5 OR 6 OR 7 OR 8 OR 9 OR 10 OR 11 OR 12 OR 13 OR 14 OR 15 |
| 17 | "Botulinum Toxins, Type A" [Mesh]                                             |
| 18 | Clostridium botulinum A Toxin [Title/Abstract]                                |
| 19 | Botulinum Toxin A [Title/Abstract]                                            |
| 20 | Botulinum Neurotoxin A [Title/Abstract]                                       |
| 21 | Botulinum A Toxin [Title/Abstract]                                            |
| 22 | Botulinum Toxin Type A [Title/Abstract]                                       |
| 23 | Botulinum Neurotoxin Type A [Title/Abstract]                                  |
| 24 | Clostridium Botulinum Toxin Type A [Title/Abstract]                           |
| 25 | Meditoxin [Title/Abstract]                                                    |
| 26 | Botox [Title/Abstract]                                                        |
| 27 | Neuronox [Title/Abstract]                                                     |
| 28 | Oculinum [Title/Abstract]                                                     |
| 29 | OnabotulinumtoxinA [Title/Abstract]                                           |
| 30 | 17 OR 18 OR 19 OR 20 OR 21 OR 22 OR 23 OR 24 OR 25 OR 26 OR 27 OR 28 OR 29    |
| 31 | 16 AND 30                                                                     |

### 2. Embase search strategy

|   |                               |
|---|-------------------------------|
| 1 | 'Diabetic Neuropathy'/exp     |
| 2 | 'diabetes neuropathy':ab,ti   |
| 3 | 'diabetic neuritis':ab,ti     |
| 4 | 'diabetic neuropathies':ab,ti |

|    |                                                                                                                                              |
|----|----------------------------------------------------------------------------------------------------------------------------------------------|
| 5  | 'diabetic peripheral neuropath*' :ab,ti                                                                                                      |
| 6  | 'diabetic polyneuritis' :ab,ti                                                                                                               |
| 7  | 'diabetic polyneuropathy*' :ab,ti                                                                                                            |
| 8  | 'diabetic neuralgia*' :ab,ti                                                                                                                 |
| 9  | 'painful diabetic neuropath*' :ab,ti                                                                                                         |
| 10 | 1 OR 2 OR 3 OR 4 OR 5 OR 6 OR 7 OR 8 OR 9                                                                                                    |
| 11 | 'botulinum toxin A' /exp                                                                                                                     |
| 12 | 'botulinum a toxin':ab,ti                                                                                                                    |
| 13 | 'botulinum toxin type A':ab,ti                                                                                                               |
| 14 | 'abobotulinum toxin A':ab,ti                                                                                                                 |
| 15 | 'BoNT A':ab,ti                                                                                                                               |
| 16 | 'BoNT serotype A':ab,ti                                                                                                                      |
| 17 | 'botox':ab,ti                                                                                                                                |
| 18 | 'botulin toxin a':ab,ti                                                                                                                      |
| 19 | 'botulinum a toxin' :ab,ti                                                                                                                   |
| 20 | 'botulinum neurotoxin a' :ab,ti                                                                                                              |
| 21 | 'botulinum neurotoxin type A' :ab,ti                                                                                                         |
| 22 | 'botulinum toxin type A' :ab,ti                                                                                                              |
| 23 | BTXA:ab,ti                                                                                                                                   |
| 24 | 'clostridium botulinum neurotoxin type A' :ab,ti                                                                                             |
| 25 | 'clostridium botulinum toxin type a' :ab,ti                                                                                                  |
| 26 | 'daxibotulinum toxin A' :ab,ti                                                                                                               |
| 27 | 'evabotulinum toxin A' :ab,ti                                                                                                                |
| 28 | 'gemibotulinum toxin A' :ab,ti                                                                                                               |
| 29 | 'letibotulinum toxin A' :ab,ti                                                                                                               |
| 30 | meditoxin:ab,ti                                                                                                                              |
| 31 | 'nivobotulinum toxin A' :ab,ti                                                                                                               |
| 32 | 'onabotulinum toxin A' :ab,ti                                                                                                                |
| 33 | 'prabotulinum toxin A' :ab,ti                                                                                                                |
| 34 | 'relabotulinum toxin A' :ab,ti                                                                                                               |
| 35 | 11 OR 12 OR 13 OR 14 OR 15 OR 16 OR 17 OR 18 OR 19 OR 20 OR 21 OR 22 OR 23 OR 24 OR 25 OR 26 OR 27 OR 28 OR 29 OR 30 OR 31 OR 32 OR 33 OR 34 |
| 36 | 10 AND 35                                                                                                                                    |

### 3. Cochrane Library search strategy

|   |                                                                        |
|---|------------------------------------------------------------------------|
| 1 | "Diabetic Neuropathies" [Mesh Term]                                    |
| 2 | Diabetic Neuropath* [Title Abstract Keyword]                           |
| 3 | Diabetic Neuralgia* [Title Abstract Keyword]                           |
| 4 | Diabetic Autonomic Neuropath* [Title Abstract Keyword]                 |
| 5 | Painful Diabetic Neuropath* [Title Abstract Keyword]                   |
| 6 | Symmetric Diabetic Proximal Motor Neuropath* [Title Abstract Keyword]  |
| 7 | Asymmetric Diabetic Proximal Motor Neuropath* [Title Abstract Keyword] |
| 8 | Diabetic Asymmetric Polyneuropath* [Title Abstract Keyword]            |

|    |                                                                               |
|----|-------------------------------------------------------------------------------|
| 9  | Diabetic Mononeuropath* [Title Abstract Keyword]                              |
| 10 | Diabetic Mononeuropathy Simplex [Title Abstract Keyword]                      |
| 11 | Diabetic Amyotroph* [Title Abstract Keyword]                                  |
| 12 | Diabetic Polyneuropath* [Title Abstract Keyword]                              |
| 13 | Diabetic neuritis [Title Abstract Keyword]                                    |
| 14 | Diabetic peripheral neuropath* [Title Abstract Keyword]                       |
| 15 | Diabetic polyneuritis [Title Abstract Keyword]                                |
| 16 | 1 OR 2 OR 3 OR 4 OR 5 OR 6 OR 7 OR 8 OR 9 OR 10 OR 11 OR 12 OR 13 OR 14 OR 15 |
| 17 | "Botulinum Toxins, Type A" [Mesh]                                             |
| 18 | Clostridium botulinum A Toxin [Title Abstract Keyword]                        |
| 19 | Botulinum Toxin A [Title Abstract Keyword]                                    |
| 20 | Botulinum Neurotoxin A [Title Abstract Keyword]                               |
| 21 | Botulinum A Toxin [Title Abstract Keyword]                                    |
| 22 | Botulinum Toxin Type A [Title Abstract Keyword]                               |
| 23 | Botulinum Neurotoxin Type A [Title Abstract Keyword]                          |
| 24 | Clostridium Botulinum Toxin Type A [Title Abstract Keyword]                   |
| 25 | Meditoxin [Title Abstract Keyword]                                            |
| 26 | Botox [Title Abstract Keyword]                                                |
| 27 | Neuronox [Title Abstract Keyword]                                             |
| 28 | Oculinum [Title Abstract Keyword]                                             |
| 29 | OnabotulinumtoxinA [Title Abstract Keyword]                                   |
| 30 | 17 OR 18 OR 19 OR 20 OR 21 OR 22 OR 23 OR 24 OR 25 OR 26 OR 27 OR 28 OR 29    |
| 31 | 16 AND 30                                                                     |

### Supplementary Figure

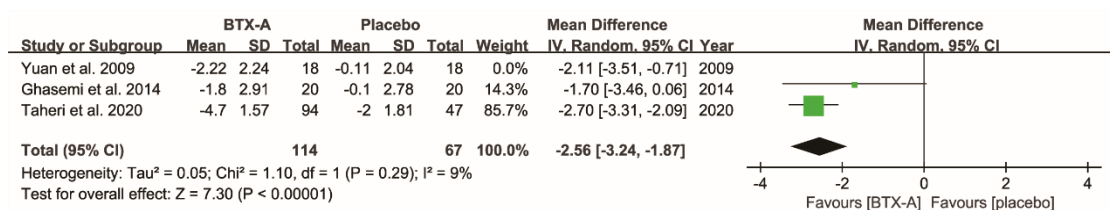

**Figure S1** Sensitivity analysis of change in visual analog scale (VAS) score following treatment with botulinum toxin type A (BTX-A) for diabetic peripheral neuropathy (DPN) pain
